# Supplementary material
Source: PubMed Central journal article supplement (PMC7237775)
Supplement: AEM.00287-20-s0001.pdf [file AEM.00287-20-s0001.pdf]

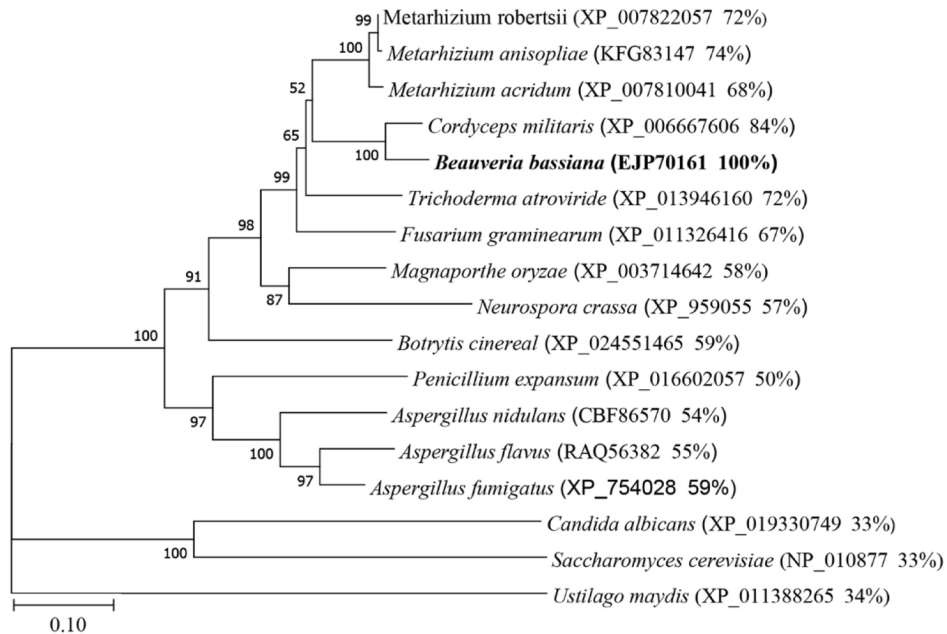

**FIG S1** Phylogenetic relationships of Rad23 orthologs found in *B. bassiana* and other entomopathogenic or non-entomopathogenic fungi. The NCBI accession code of each protein and the identity of its sequence to the *B. bassiana* Rad23 are shown in the parentheses following each fungal name. The bootstrap values of 1000 replications are given at nodes. Scale: branch length proportional to genetic distance assessed with the neighbor-joining method in MEGA7 software at <http://www.megasoftware.net/>.

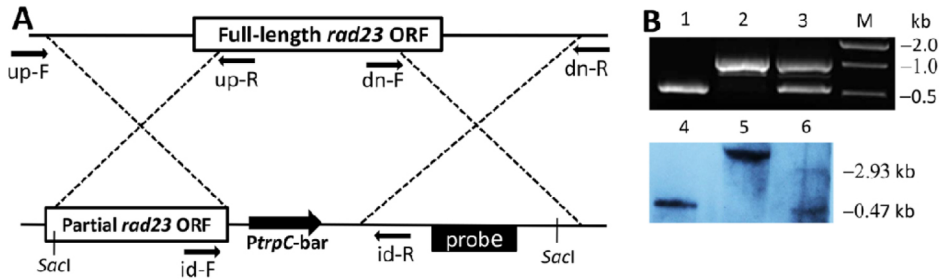

**FIG S2** Generation and identification of *rad23* mutants. **(A)** Schematic diagram for the deletion strategy of *rad23* in *B. bassiana*. **(B)** The *rad23* mutants identified through PCR (lanes 1–3) and Southern blot (lanes 4–6) analyses with paired primers and amplified probe (Table S1). Lanes 1 and 4: wild-type. Lanes 2 and 5:  $\Delta rad23$  mutant. Lanes 3 and 6:  $\Delta rad23::rad23$  mutant. Genomic DNA of each strain was digested with *SacI* at the marked sites to probe *rad23* through Southern hybridization.

**TABLE S1** Paired primers used for manipulation of *rad23* in *B. bassiana*.

| Primers     | Paired sequences (5'–3')*                                                                                                              | Purpose                                                                |
|-------------|----------------------------------------------------------------------------------------------------------------------------------------|------------------------------------------------------------------------|
| Rad23-F/R   | <u>ATTCAATCACAAACACCTTCAAATGAAGGTCACCTTCAGAGATCTCA</u> / <u>TCCTCGCCC</u><br><u>TTGCTCACCA</u> TTGGCTCGCAGGCGGCTGCTCGTCC               | Cloning <i>rad23</i> cDNA (1134 bp) for fusion to <i>mCherry</i>       |
| Rad23up-F/R | <u>TGGGCCCGCGCGCC</u> <b><i>GAATTC</i></b> CAAGCGTAGCCGAAGCC / <u>TGGCTGCAGGTCGACGG</u><br><b><i>ATCC</i></b> TGCGTGGTTGATTGAGTA       | Cloning <i>rad23</i> 5' fragment (1355 bp) for <i>rad23</i> deletion   |
| Rad23dn-F/R | <u>GACCCATGGCTCGAG</u> <b><i>TCTAGA</i></b> AAGGAACGCATTTCTACCG / <u>GGTGGTGGTGGCTAG</u><br><b><i>CGTTAACT</i></b> CCCCGATTACTCGTTGTGC | Cloning <i>rad23</i> 3' fragment (1552 bp) for <i>rad23</i> deletion   |
| Rad23fl-F/R | <u>GGGGACAAGTTTGTACAAAAAAGCAGGCTCACCACCACAAGAAACAGC</u> / <u>GGGGA</u><br><u>CCACTTTGTACAAGAAAGCTGGGTGCATAGGATTCGGCGTAG</u>            | Cloning full-length <i>rad23</i> (4767 bp) for complementation         |
| pRad23-F/R  | CCATCAAACGCCAACCC / TGTTTCGTCCGCACCTGA                                                                                                 | PCR detecting <i>rad23</i> (565/1090 bp)                               |
| sbRad23-F/R | CCCGCAGTGAATCACATTTTGGC / TGTGGAGGCGTTTCGATTTGACTT                                                                                     | Southern probe of <i>rad23</i> (283 bp)                                |
| cPhr1-F/R   | CAATCACAAACACCTTCAAATGGCGCCTCGTCAACGAAGCG / CTTGCTCACCATG<br>AATTC_GATATCCTACGCCACAGCCGCTTGTACGCA                                      | Cloning <i>phr1</i> cDNA (1764 bp) for yeast hybrid                    |
| cPhr2-F/R   | CAATCACAAACACCTTCAAATGACAAAGCCCAGAGTCATTTATT / CTTGCTCACCAT<br>GAATTC GATATCTCACGTTTTCTGCTTCTTCGCTGAC                                  | Cloning <i>phr2</i> cDNA (1872 bp) for yeast hybrid and overexpression |

\* Bold regions in italics denote the restriction enzyme sites for deletion of *rad23* (*EcoRI/BamHI* and *XbaI/SpeI*).

Underlined regions denote the fragments for *rad23* fusion to *mCherry*, homogenous recombination of *bar*-separated 5' and 3' fragments for targeted gene deletion or the gateway exchange fragments for targeted gene complementation.

**TANLE S2.** Paired primers used for transcriptional profiling of phenotype-related genes via qPCR.

| Gene                                            | Tag locus* | Annotation                            | Sequences (5'–3') of paired primers                      |
|-------------------------------------------------|------------|---------------------------------------|----------------------------------------------------------|
| <b>Used as internal standard</b>                |            |                                       |                                                          |
| <i>actin</i>                                    | BBA_04860  | β-actin                               | GGCAACATTGTCATGTCTGG / TTTGCTGGAAGGTGGATAGG              |
| <i>tef</i>                                      | BBA_02388  | translation elongation factor 1 alpha | TGAGGCTTTCACCGACTACC / TTATTCTTGGTGGCCTGG                |
| <b>Involved in photoreactivation</b>            |            |                                       |                                                          |
| <i>rad23</i>                                    | BBA_01030  | UV excision repair protein Rad23      | AGCAGAAATTCACCTCGAA / ACGAAGCCCTTTCTCTCAAT               |
| <i>phr1</i>                                     | BBA_01664  | CPD photolyase                        | AAAAAGAGAATCCGCTTCTCACTTACA / AAAAAGCCAGTAGCCTTATTATCTTG |
| <i>phr2</i>                                     | BBA_01034  | 6-4 PP photolyase                     | AAAAAGTTCACATCATTTCTCCACCAC / AAAAAGCTTCGACCCGACGATCT    |
| <b>Involved in response to oxidative stress</b> |            |                                       |                                                          |
| <i>sod1</i>                                     | BBA_02311  | Cytosolic Cu/ZnSOD                    | GCGGCTTCCACATCCACACCTTTG / GGTCCAGCGTTGCCAGTCTTGAG       |
| <i>sod2</i>                                     | BBA_09706  | Cytosolic MnSOD                       | CCAGTGTTTGGCATTGACATG / TCAGCCGCTTCCAGTTGATG             |
| <i>sod3</i>                                     | BBA_09382  | Mitochondrial MnSOD                   | TCTCCGGCAAGATTATGGAGC / TTGGCGTCATTCTTGGCCT              |
| <i>sod4</i>                                     | BBA_04317  | Mitochondrial FeSOD                   | CGAGATGGTCTTACGGCTTACG / GCTCCAGGTGTTGAGGCATAG           |
| <i>sod5</i>                                     | BBA_01984  | Cell wall-anchored Cu/ZnSOD           | CGGCGACCTCAGCGGCAAGTAC / GCCAGCAACAACAGGGACCGTAGG        |
| <i>cat1</i>                                     | BBA_06186  | Catalase A                            | CCGTCTGGGCATCAACTGGGAAG / GCTGGGCGTGGTCTGGTAG            |
| <i>cat2</i>                                     | BBA_05603  | Catalase B                            | CCTCTGACGTTGGCGGCCCTTTC / CCGTGTCCGTGCTGCCTCGTG          |
| <i>cat3</i>                                     | BBA_09109  | Catalase C                            | GAGGAGCCACAGCAACGCACAAGAG / TGAGGACGACAAGGCCGCCATTC      |
| <i>cat4</i>                                     | BBA_09760  | Catalase D                            | CGGCTGCGGTGTCTTGTCCATAC / CCTTGTGCGCGTTCTGGCGAAG         |
| <i>cat5</i>                                     | BBA_09338  | Catalase P                            | GCTGGGCTGATCTGCTGGTCTTG / TCCTTGCTGTAACGGTGGCTGTGCG      |
| <i>cat6</i>                                     | BBA_06567  | Catalase-like protein                 | TCAAGTCGGTTCAGGAGATGGAG / TTGTTGCGTCTTCAATCGGAGTG        |
| <b>Involved in hog pathway</b>                  |            |                                       |                                                          |
| <i>ssk2</i>                                     | BBA_00937  | MAP kinase kinase kinase Ssk2         | TCAGACCTGCTTCGTGTTTG / GAATGTGTCGTCCACGTGTC              |
| <i>pbs2</i>                                     | BBA_02330  | MAP kinase kinase Pbs2                | ATTTGCGACTTTGGCGTTAG / AAGACTCCACACGTGCTCT               |
| <i>hog1</i>                                     | BBA_05209  | MAP kinase Hog1                       | ATACTACCGCGCTCCTGAGA / CTGGCAATGGTGTGATGAC               |
| <b>Involved in asexual development</b>          |            |                                       |                                                          |
| <i>brlA</i>                                     | BBA_07544  | Development activator BrlA            | GACCCAGTTCACAGACAAG / CAGTAATCTTCGTGCTTCTC               |
| <i>abaA</i>                                     | BBA_00300  | Conidiation factor AbaA               | GCAAGTCTCCAGCCATAT / CTCCTCTTCGTATAGTAGTC                |
| <i>wetA</i>                                     | BBA_06126  | Conidial maturation factor WetA       | CGCAGACGAATTTGACTT / GCTGGTGGTTGAATACAT                  |
| <i>fluG</i>                                     | BBA_04942  | Developmental protein FluG            | CCATCAGGATACATCGTCTT / AGATTCATAGTCTCCGCTAA              |
| <b>Involved in DNA damage repair</b>            |            |                                       |                                                          |
| <i>asf</i>                                      | BBA_01428  | ASF1-like histone chaperone           | TAAGTGTGGTCTTCTGA / GAGTCGATTCTGTGTTTC                   |
| <i>chk2</i>                                     | BBA_06016  | Checkpoint kinase 2                   | CGAATCGTCACTGCTTAA / GTTCCGTTGCTGGATAAG                  |
| <i>mec1</i>                                     | BBA_02334  | Putative protein kinase MEC1          | AGGCACGACAAGAGAATA / TGAGAAGTGACAGGATGG                  |
| <i>PCNA</i>                                     | BBA_00352  | Proliferating cell nuclear antigen    | GGTCAAGATTTGCTGTC / GTAGAAGTGACAGGATGG                   |
| <i>rad4A</i>                                    | BBA_02814  | Rad4 transglutaminase-like protein    | CCTAGTGAGGAGCCACAAGC / GACGTCCTGGAACCAAGT                |
| <i>rad4B</i>                                    | BBA_02963  | Rad4 transglutaminase-like protein    | CGGACAAACCCGAGATAAAA / GAGCTCTTCCCTGTTTGTGTC             |
| <i>rad52</i>                                    | BBA_06117  | Putative recombinase RAD52            | AAGTCTTGCGTCGTTATC / GCTATCAGTGTTCCTTCA                  |
| <i>rad53</i>                                    | BBA_00126  | Putative protein kinase RAD53         | AACATCCTCATCAACTCTC / ATCGCTGTAATCATCTT                  |
| <i>tell</i>                                     | BBA_02241  | PDNA-binding protein kinase TEL1      | AATATGATTGATGAGTGGGAAG / AAGAATGATGCGGTAGAA              |
| <i>top1</i>                                     | BBA_00975  | Topoisomerase I                       | AATACGAGCACATAACTT / GTCTCATTGTAGCGAATA                  |
| <i>yku70</i>                                    | BBA_06892  | DNA helicase YKU70                    | CGGTCGCTATTCTCTAAT / GCTTGTCTGTAATGATG                   |

\* Gene accession codes of *B. bassiana* genome under the NCBI accession NL\_ADAH00000000.
